# Supplementary material for: Comparison between Dexamethasone and Methylprednisolone Therapy in Patients with COVID-19 Pneumonia Admitted to Non-Intensive Medical Units
Source: MDPI journal article supplement (doi:10.3390/jcm10245812), 2021-12-12
Supplement: s1 [file s1]

**Table S1:** Symptom presentation at admission

| Symptom                          | Methylprednisolone<br>(n=136) | Dexamethasone<br>(n=110) | p     |
|----------------------------------|-------------------------------|--------------------------|-------|
| Fever n (%)                      | 117 (86.0)                    | 95 (86.4)                | 0.940 |
| Dyspnoea n (%)                   | 92 (67.6)                     | 65 (59.1)                | 0.165 |
| Cough n (%)                      | 69 (50.7)                     | 66 (60.0)                | 0.147 |
| Myalgia n (%)                    | 8 (5.9)                       | 8 (7.3)                  | 0.660 |
| Headache n (%)                   | 4 (2.9)                       | 3 (2.7)                  | 0.920 |
| Asthenia n (%)                   | 45 (33.1)                     | 50 (45.5)                | 0.048 |
| Pharyngeal pain n (%)            | 2 (1.5)                       | 0 (0.0)                  | 0.202 |
| Rhinorrhoea n (%)                | 4 (2.9)                       | 1 (0.9)                  | 0.261 |
| Anosmia n (%)                    | 2 (1.5)                       | 3 (2.7)                  | 0.487 |
| Dysgeusia n (%)                  | 3 (2.2)                       | 1 (0.9)                  | 0.424 |
| Gastrointestinal disorders n (%) | 18 (13.2)                     | 23 (20.9)                | 0.108 |
| Syncope n (%)                    | 12 (8.8)                      | 6 (5.5)                  | 0.313 |

**Table S2:** Clinical characteristics at admission.

| N                                 | Methylprednisolone (n=136) | Dexamethasone<br>(n=110) | p     |
|-----------------------------------|----------------------------|--------------------------|-------|
| Heart rate (mean, SD)             | 85 (17)                    | 87 (17)                  | 0.609 |
| Mean SBP mmHg (mean, SD)          | 133 (24)                   | 141 (20)                 | 0.013 |
| Mean DBP mmHg (mean, SD)          | 77 (15)                    | 82 (12)                  | 0.021 |
| Oxygen Saturation % (mean, SD)    | 93.1 (3.1)                 | 93.0 (4.2)               | 0.716 |
| Respiratory rate (mean, SD)       | 23 (6)                     | 22 (5)                   | 0.261 |
| Body temperature °C (mean, DS)    | 36.8 (1.3)                 | 36.6 (1.0)               | 0.492 |
| SOFA score (mean, SD)             | 3.85 (1.4)                 | 4.20 (1.5)               | 0.330 |
| Padua prediction score (mean, SD) | 2.09 (2.2)                 | 1.99 (2.0)               | 0.683 |

Abbreviations: SD, standard deviation; SBP systolic blood pressure; DBP diastolic blood pressure

**Table S3.** Primary outcomes in patients with age  $\geq 80$  years (n=95).

| <b>30 days mortality</b>                                                                                      |                    |          |                    |          |
|---------------------------------------------------------------------------------------------------------------|--------------------|----------|--------------------|----------|
| <b>Unadjusted</b>                                                                                             |                    |          | <b>Adjusted*</b>   |          |
| <b>Treatment</b>                                                                                              | <b>OR (95% CI)</b> | <b>p</b> | <b>OR (95% CI)</b> | <b>p</b> |
| <b>DEX vs. MP</b>                                                                                             | 1.25 (0.54 – 2.92) | 0.591    | 1.46 (0.57 – 3.69) | 0.424    |
| <b>s-ICU/ICU admission</b>                                                                                    |                    |          |                    |          |
| <b>Unadjusted</b>                                                                                             |                    |          | <b>Adjusted*</b>   |          |
| <b>Treatment</b>                                                                                              | <b>OR (95% CI)</b> | <b>p</b> | <b>OR (95% CI)</b> | <b>p</b> |
| <b>DEX vs. MP</b>                                                                                             | 0.54 (0.16 – 1.84) | 0.328    | 0.70 (0.19 – 2.59) | 0.598    |
| *Adjusted by sex, comorbidities, use of antibiotics, use of Remdesivir, duration of symptoms before admission |                    |          |                    |          |

Abbreviations: s-ICU: semi-intensive care unit; ICU: intensive care unit, DEX Dexamethasone; MP: Methylprednisolone; OR: odds ratio; CI: confidence interval.

**Table S4.** Primary outcomes in patients with age < 80 years (n=151).

| <b>30 days mortality</b>                                                                                      |                     |          |                    |          |
|---------------------------------------------------------------------------------------------------------------|---------------------|----------|--------------------|----------|
| <b>Unadjusted</b>                                                                                             |                     |          | <b>Adjusted*</b>   |          |
| <b>Treatment</b>                                                                                              | <b>OR (95% CI)</b>  | <b>p</b> | <b>OR (95% CI)</b> | <b>p</b> |
| <b>DEX vs. MP</b>                                                                                             | 0.64 (0.10 – 3.997) | 0.641    | 1.04 (0.14 – 7.36) | 0.969    |
| <b>s-ICU/ICU admission</b>                                                                                    |                     |          |                    |          |
| <b>Unadjusted</b>                                                                                             |                     |          | <b>Adjusted*</b>   |          |
| <b>Treatment</b>                                                                                              | <b>OR (95% CI)</b>  | <b>p</b> | <b>OR (95% CI)</b> | <b>p</b> |
| <b>DEX vs. MP</b>                                                                                             | 0.63 (0.17 – 2.36)  | 0.502    | 0.84 (0.20 – 3.58) | 0.821    |
| *Adjusted by sex, comorbidities, use of antibiotics, use of Remdesivir, duration of symptoms before admission |                     |          |                    |          |

Abbreviations: s-ICU: semi-intensive care unit; ICU: intensive care unit, DEX Dexamethasone; MP: Methylprednisolone; OR: odds ratio; CI: confidence interval.

**Table S5:** Rates and type of complications occurring during hospitalization (all data are expressed as n, %).

|                                            | <b>Methylprednisolone<br/>(n=136)</b> | <b>Dexamethasone<br/>(n=110)</b> | <b>p</b> |
|--------------------------------------------|---------------------------------------|----------------------------------|----------|
| <b>All Complications</b>                   | 60 (44.1)                             | 41 (37.3)                        | 0.278    |
| <b>Deep venous thrombosis</b>              | 0 (0.0)                               | 1 (0.9)                          | 0.265    |
| <b>Pulmonary embolism</b>                  | 8 (5.9)                               | 9 (8.2)                          | 0.480    |
| <b>Haemorrhage</b>                         | 1 (0.7)                               | 1 (0.9)                          | 0.880    |
| <b>Atrial Fibrillation (new diagnosis)</b> | 8 (5.9)                               | 4 (3.6)                          | 0.416    |
| <b>Heart failure</b>                       | 4 (2.9)                               | 3 (2.7)                          | 0.920    |
| <b>Stroke/TIA</b>                          | 0 (0.0)                               | 1 (0.9)                          | 0.265    |
| <b>Acute renal injury</b>                  | 2 (1.5)                               | 3 (2.7)                          | 0.487    |
| <b>Infections</b>                          | 10 (7.4)                              | 5 (4.5)                          | 0.360    |
| <b>Diabetes (new diagnosis)</b>            | 3 (2.2)                               | 6 (5.5)                          | 0.177    |
